# Supplementary material for: Seasonal variation in the internet searches for gout: an ecological study
Source: Springer Nature journal article supplement (doi:10.1007/s10067-018-4345-2), 2018-10-29
Supplement: MOESM1 [file 16234164]

## Sheet: Sheet1
Category: Health
year, month,gout: (United States)
2004	1	60
2004	2	43
2004	3	58
2004	4	47
2004	5	57
2004	6	58
2004	7	57
2004	8	60
2004	9	51
2004	10	53
2004	11	47
2004	12	52
2005	1	56
2005	2	48
2005	3	47
2005	4	54
2005	5	50
2005	6	56
2005	7	50
2005	8	52
2005	9	53
2005	10	49
2005	11	51
2005	12	49
2006	1	64
2006	2	48
2006	3	46
2006	4	54
2006	5	61
2006	6	60
2006	7	57
2006	8	58
2006	9	53
2006	10	53
2006	11	51
2006	12	52
2007	1	58
2007	2	55
2007	3	52
2007	4	58
2007	5	58
2007	6	63
2007	7	64
2007	8	54
2007	9	46
2007	10	56
2007	11	55
2007	12	52
2008	1	53
2008	2	53
2008	3	58
2008	4	56
2008	5	60
2008	6	59
2008	7	56
2008	8	58
2008	9	56
2008	10	57
2008	11	61
2008	12	57
2009	1	62
2009	2	60
2009	3	61
2009	4	70
2009	5	68
2009	6	74
2009	7	74
2009	8	77
2009	9	67
2009	10	66
2009	11	65
2009	12	62
2010	1	64
2010	2	68
2010	3	77
2010	4	76
2010	5	77
2010	6	76
2010	7	80
2010	8	73
2010	9	68
2010	10	82
2010	11	79
2010	12	74
2011	1	92
2011	2	79
2011	3	83
2011	4	90
2011	5	89
2011	6	92
2011	7	95
2011	8	93
2011	9	87
2011	10	81
2011	11	74
2011	12	68
2012	1	81
2012	2	83
2012	3	76
2012	4	76
2012	5	76
2012	6	85
2012	7	78
2012	8	72
2012	9	68
2012	10	69
2012	11	70
2012	12	62
2013	1	65
2013	2	68
2013	3	80
2013	4	72
2013	5	76
2013	6	78
2013	7	80
2013	8	77
2013	9	68
2013	10	69
2013	11	67
2013	12	71
2014	1	73
2014	2	66
2014	3	70
2014	4	79
2014	5	79
2014	6	79
2014	7	82
2014	8	78
2014	9	78
2014	10	82
2014	11	68
2014	12	72
2015	1	73
2015	2	67
2015	3	80
2015	4	77
2015	5	80
2015	6	85
2015	7	90
2015	8	84
2015	9	79
2015	10	74
2015	11	81
2015	12	78
2016	1	74
2016	2	75
2016	3	77
2016	4	78
2016	5	83
2016	6	82
2016	7	89
2016	8	80
2016	9	79
2016	10	80
2016	11	71
2016	12	77
2017	1	81
2017	2	82
2017	3	80
2017	4	88
2017	5	89
2017	6	100
2017	7	98
2017	8	93
2017	9	83
2017	10	88
2017	11	87
2017	12	88
